# Supplementary material for: In-depth cytogenetic and immunohistochemical analysis in a real world cohort - reconsidering the role of primary and secondary aberrations in multiple myeloma
Source: PubMed Central journal article supplement — Haematologica. 2023 Aug 17;109(1):318–24. doi: 10.3324/haematol.2023.283142 (PMC10772519; doi:10.3324/haematol.2023.283142), 2023-08-17
Supplement: 2023_283142_WENGER_SUPPL.pdf [file 2023_283142_WENGER_SUPPL.pdf]

# In-depth cytogenetic and immunohistochemical analysis in a real world cohort - reconsidering the role of primary and secondary aberrations in multiple myeloma

Sina Wenger,<sup>1,2</sup> Milena Pantic,<sup>1,2</sup> Gabriele Ihorst,<sup>2,3</sup> Stepan Cysar,<sup>4</sup> Marc-Antoine Calba,<sup>4</sup> Christine Greil,<sup>1,2</sup> Ralph Wäsch<sup>1,2</sup> and Monika Engelhardt<sup>1,2</sup>

<sup>1</sup>Department of Medicine I Hematology and Oncology, Faculty of Medicine and Medical Center, University of Freiburg (UKF); <sup>2</sup>Tumor Center Freiburg, Comprehensive Cancer Center Freiburg (CCCF); <sup>3</sup>Clinical Trials Unit, Faculty of Medicine, University of Freiburg and <sup>4</sup>Department of Pathology, Faculty of Medicine, University of Freiburg, Freiburg, Germany

Correspondence:

M. ENGELHARDT - monika.engelhardt@uniklinik-freiburg.de

<https://doi.org/10.3324/haematol.2023.283142>

Received: March 17, 2023.

Accepted: August 9, 2023.

Early view: August 17, 2023.

©2024 Ferrata Storti Foundation

Published under a CC BY-NC license

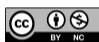

## Supplements

**Suppl. Table 1. Subgroup 2 (no IgH-translocation/hyperdiploidy, but other cytogenetic aberrations; n=40) divided based on their monosomy 13/del13q14-status**

| Subgroup 2<br>(n=40)                                       | (a) patients with only<br>Monosomy 13 / del13q14<br>(n=3) | (b) patients with Monosomy 13 / del13q14<br>and ≥1 additional cytogenetic event<br>(n=34) | (c) patients without<br>Monosomy 13 / del13q14<br>(n=3) |
|------------------------------------------------------------|-----------------------------------------------------------|-------------------------------------------------------------------------------------------|---------------------------------------------------------|
| <b>Demographic data</b>                                    |                                                           |                                                                                           |                                                         |
| Age at ID<br>[years; median / mean (range)]                | 57 (56 - 60)                                              | 62 (46 - 89)                                                                              | 73 (70 - 73)                                            |
| Gender: male / female [n (%)]                              | 3 (100) / 0                                               | 18 (53) / 16 (47)                                                                         | 1 (33) / 2 (67)                                         |
| KPS [%; median (range)]                                    | 90 (90 - 100)                                             | 80 (20 - 100)                                                                             | 90 (70 - 100)                                           |
| <b>Type of MM [n (%)]</b>                                  |                                                           |                                                                                           |                                                         |
| IgG / IgA / LC                                             | 1 (33) / 0 / 2 (67)                                       | 13 (38) / 9 (27) / 12 (35)                                                                | 3 (100) / 0 / 0                                         |
| κ : λ LC type                                              | 2 (67) / 1 (33)                                           | 18 (53) / 16 (47)                                                                         | 1 (33) / 2 (67)                                         |
| <b>Risk stratification [n (%)]</b>                         |                                                           |                                                                                           |                                                         |
| ISS I / II / III                                           | 1 (33) / 0 / 2 (67)                                       | 9 (27) / 13 (38) / 12 (35)                                                                | 0 / 2 (67) / 1 (33)                                     |
| R-ISS I / II / III                                         | 0 / 2 (67) / 1 (33)                                       | 4 (12) / 22 (64) / 8 (24)                                                                 | 0 / 2 (67) / 1 (33)                                     |
| R-MCI<br>fit (0-3) / intermediate-fit (4-6)<br>frail (7-9) | 2 (67) / 1 (33)<br>0                                      | 9 (26) / 16 (48)<br>9 (26)                                                                | 0 / 2 (67)<br>1 (33)                                    |
| <b>Outcome [n (%)]</b>                                     |                                                           |                                                                                           |                                                         |
| Pts alive (yes / no)                                       | 3 (100) / 0                                               | 23 (68) / 11 (32)                                                                         | 2 (67) / 1 (33)                                         |
| PFS [month; median (range)]                                | 43 (32 - 49)                                              | 41 (0 - 288)                                                                              | 13 (9 - 57)                                             |
| *p-value of (a), (b) and (c)                               | 0.5549                                                    |                                                                                           |                                                         |
| OS [month; median (range)]                                 | not reached (92 - 128)                                    | 116 (0 - 288)                                                                             | 21 (13 - 62)                                            |
| *p-value of (a), (b) and (c)                               | 0.1134                                                    |                                                                                           |                                                         |

**Abbreviations:** ID=initial diagnosis, KPS=Karnofsky-Performance-Status, LC=light chain, ISS=International Staging System, R-ISS=Revised-International Staging System, R-MCI=Revised-Myeloma Comorbidity Score, pts=patients, PFS=Progression Free Survival, OS=Overall Survival.

\*Kaplan-Meier analysis revealed p-values of 0.5549 for PFS and 0.1134 for OS when comparing patients with exclusively monosomy 13/del13q14 (a) vs. those with monosomy 13/del13q14 accompanied by secondary aberrations (b) vs. patients without monosomy 13/del13q14 but various other cytogenetic aberrations (c); the non-significance likely related to limited numbers of patients.

**Suppl. Table 2. Technical specifications for IHC antibodies**

| Target    | Vendor        | Clone    | Dilution     | Species | Staining  |
|-----------|---------------|----------|--------------|---------|-----------|
| Cyclin D1 | Dako/Aligent  | EP12     | ready to use | rabbit  | nucleus   |
| Cyclin D2 | Abcam         | ab230883 | 1:10.000     | rabbit  | nucleus   |
| Cyclin D3 | CellSignaling | DCS-22   | 1:500        | mouse   | cytoplasm |
